# Supplementary material
Source: PubMed Central journal article supplement (PMC3749858)

# Sequential catecholaminergic consequences of *Chga* genetic variation in HXBxBXH RI strains:

*Chga* gene → *Chga* protein → *Dbh* → Norepinephrine → *Pnmt* → Epinephrine

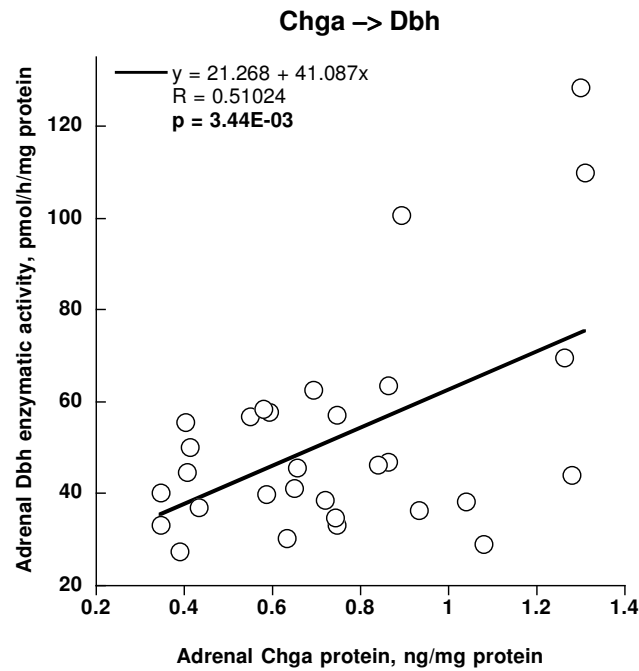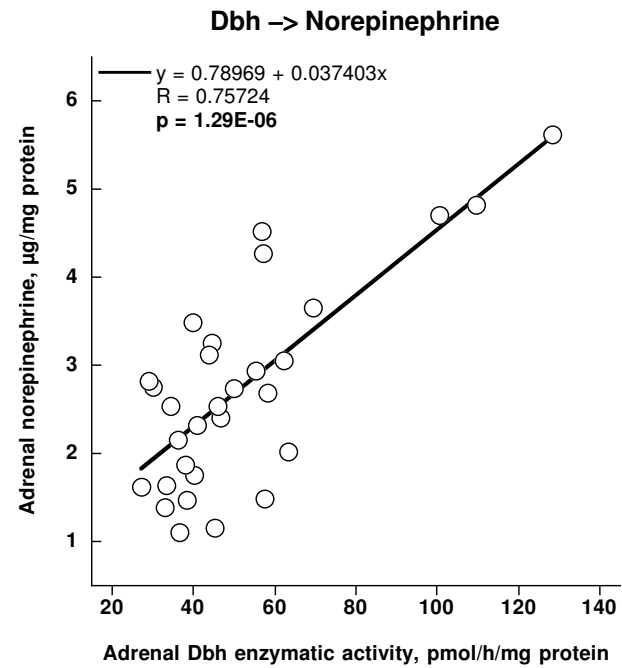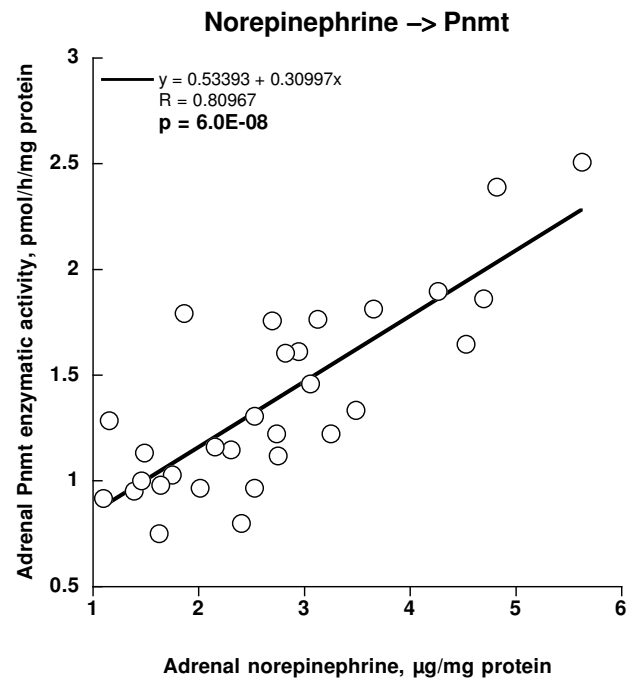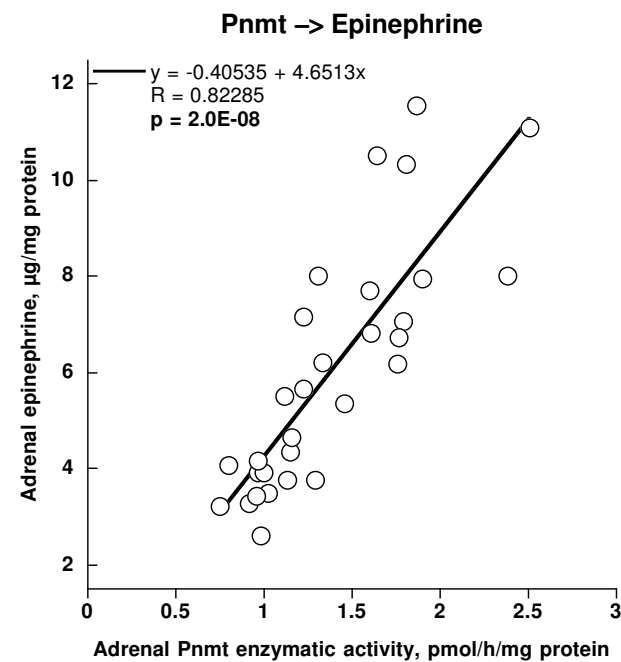

# *Chga* 3'-UTR/rno-miR-22 hybridization: Effect of 3'-UTR variant G+174T

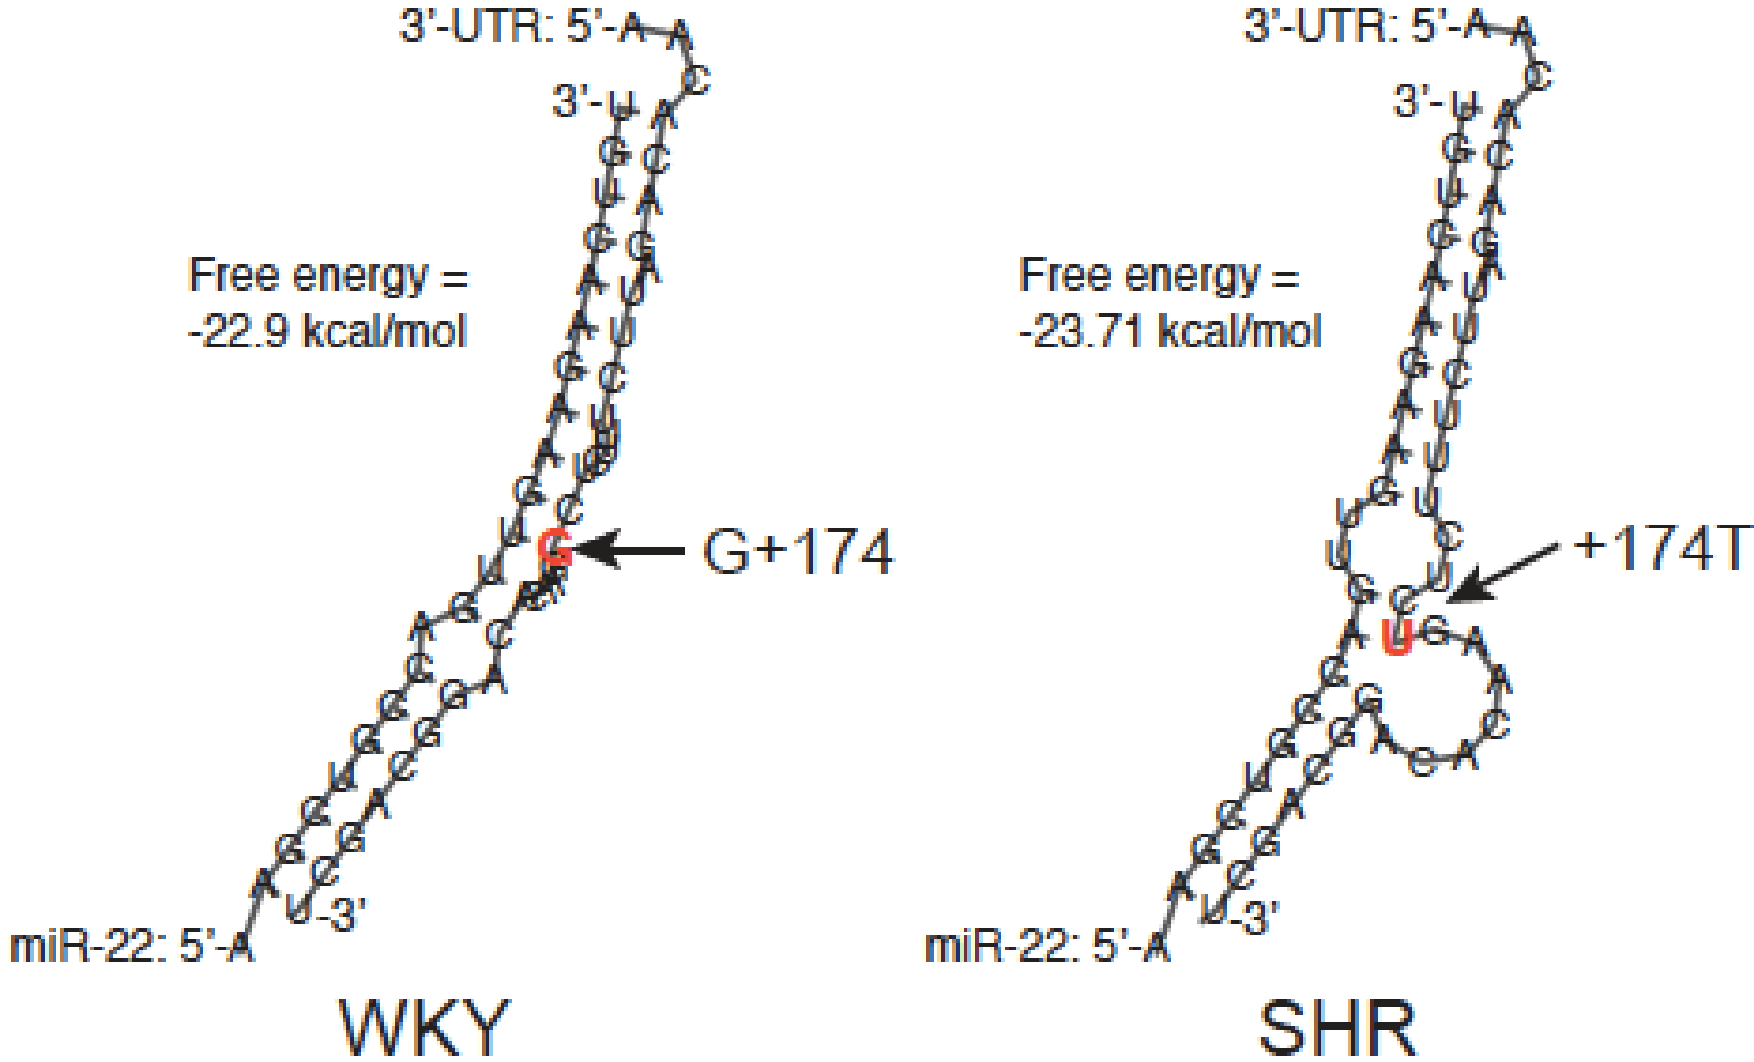

Supplement: supp_ddt213_ddt213supp_figs.pdf [file supp_ddt213_ddt213supp_figs.pdf]
